# Supplementary material
Source: MDPI journal article supplement (https://www.mdpi.com/2077-0472/11/11/1053)
Supplement: s1 [file s1]

**Table S1.** Grain yield, protein concentrations, nitrogen uptake and apparent nitrogen recovery efficiency in three slurry fertilization trials, Foulum, DK, 2014, n = 4, values in brackets indicate standard deviations, letters indicate significance levels after mixed effects model analysis and HSD post-hoc test, p < 0.05. AD anaerobic digestate, AS, separated AD, PS pig slurry, MS mink slurry, CS cattle slurry; ac acidified (target pH 6.0) th trail hose, inc incorporation by harrow, inj closed slot injection.

| crop   | trial | Treatment*    | Grain<br>t/ha |        |    | Protein<br>% |        |    | Nup grain<br>kg N/ha |         |      | Ntot<br>kg N/ha |         |      | Anre<br>% |         |     |
|--------|-------|---------------|---------------|--------|----|--------------|--------|----|----------------------|---------|------|-----------------|---------|------|-----------|---------|-----|
| Wheat  | 1st   | 100 CAN       | 3.67          | (1.02) | ab | 8.87         | (2.28) | a  | 54.55                | (8.46)  | c    | 77.10           | (5.90)  | c    | 30.34     | (5.90)  | a   |
|        |       | 150 CAN       | 4.63          | (0.84) | a  | 10.38        | (1.02) | a  | 83.20                | (7.99)  | a    | 119.98          | (11.26) | a    | 48.81     | (8.66)  | a   |
|        |       | AD            | 4.07          | (0.37) | ab | 8.41         | (0.78) | a  | 60.03                | (7.90)  | bc   | 85.55           | (12.20) | abc  | 35.27     | (11.09) | a   |
|        |       | AD ac         | 4.43          | (1.18) | a  | 9.39         | (1.09) | a  | 71.35                | (11.00) | abc  | 101.60          | (15.42) | abc  | 49.86     | (14.02) | a   |
|        |       | CS            | 4.09          | (0.75) | ab | 9.05         | (0.85) | a  | 64.10                | (5.68)  | abc  | 94.75           | (13.84) | abc  | 43.63     | (12.58) | a   |
|        |       | CS ac         | 4.80          | (0.91) | a  | 9.80         | (1.82) | a  | 80.58                | (5.37)  | ab   | 110.48          | (14.17) | ab   | 57.93     | (12.88) | a   |
|        |       | AS            | 4.94          | (1.90) | a  | 9.07         | (1.77) | a  | 74.50                | (19.03) | abc  | 101.28          | (23.20) | abc  | 49.56     | (21.09) | a   |
|        |       | AS ac         | 4.63          | (0.84) | a  | 9.17         | (1.66) | a  | 72.78                | (3.66)  | abc  | 100.78          | (9.27)  | abc  | 49.11     | (8.42)  | a   |
|        |       | MS            | 4.87          | (0.40) | a  | 9.17         | (0.56) | a  | 78.20                | (5.49)  | ab   | 107.93          | (7.65)  | abc  | 55.61     | (6.96)  | a   |
|        |       | MS ac         | 4.29          | (0.36) | a  | 10.07        | (0.31) | a  | 75.60                | (4.53)  | abc  | 109.88          | (5.38)  | ab   | 57.38     | (4.89)  | a   |
|        |       | Control (0 N) | 2.21          | (0.59) | b  | 7.88         | (0.56) | a  | 30.01                | (6.71)  | d    | 46.76           | (5.90)  | d    | -         | -       | -   |
|        |       | PS            | 3.92          | (1.50) | ab | 10.23        | (1.65) | a  | 67.23                | (16.78) | abc  | 94.23           | (12.83) | abc  | 43.16     | (11.66) | a   |
|        |       | PS ac         | 4.11          | (1.02) | ab | 10.20        | (1.80) | a  | 71.33                | (8.60)  | abc  | 106.40          | (16.88) | abc  | 54.22     | (15.35) | a   |
|        | 2nd   | 100 CAN       | 5.26          | (0.62) | a  | 7.63         | (0.60) |    | 69.90                | (4.00)  | de   | 89.98           | (1.25)  | de   | 44.47     | (1.25)  |     |
|        |       | 150 CAN       | 6.00          | (0.64) | a  | 8.98         | (0.93) | ab | 93.70                | (1.38)  | ab   | 119.35          | (7.19)  | a    | 49.23     | (5.53)  | cd  |
|        |       | AD            | 5.23          | (0.58) | a  | 7.94         | (0.66) | b  | 72.50                | (6.57)  | de   | 96.95           | (8.12)  | cde  | 46.76     | (7.38)  | d   |
|        |       | AD ac         | 5.07          | (0.55) | a  | 8.14         | (0.52) | b  | 71.98                | (4.77)  | de   | 95.18           | (9.75)  | cde  | 45.15     | (8.87)  | cd  |
|        |       | CS            | 4.76          | (1.20) | a  | 8.22         | (1.29) | ab | 66.65                | (9.15)  | e    | 89.35           | (5.20)  | e    | 39.85     | (4.73)  | cd  |
|        |       | CS ac         | 5.08          | (0.84) | a  | 9.13         | (0.77) | ab | 80.45                | (7.93)  | bcde | 109.30          | (13.12) | abc  | 57.99     | (11.93) | abc |
|        |       | AS            | 5.76          | (0.44) | a  | 7.88         | (0.63) | b  | 79.30                | (5.74)  | bcde | 100.65          | (9.58)  | cde  | 50.13     | (8.71)  | cd  |
|        |       | AS ac         | 5.51          | (0.37) | a  | 7.98         | (0.60) | b  | 76.95                | (5.46)  | cde  | 102.15          | (10.95) | bcde | 51.49     | (9.95)  | cd  |
|        |       | MS            | 5.68          | (0.69) | a  | 8.38         | (0.80) | ab | 82.88                | (6.50)  | abcd | 106.35          | (2.95)  | abcd | 55.31     | (2.68)  | abc |
|        |       | MS ac         | 5.48          | (0.40) | a  | 9.38         | (0.73) | ab | 89.90                | (7.04)  | abc  | 118.65          | (9.29)  | ab   | 66.49     | (8.44)  | ab  |
|        |       | Control (0 N) | 2.38          | (0.23) | b  | 7.96         | (0.28) | b  | 33.24                | (3.85)  | f    | 45.50           | (6.46)  | f    | -         | -       | -   |
|        |       | PS            | 5.30          | (0.33) | a  | 8.84         | (0.27) | ab | 82.05                | (4.22)  | bcd  | 106.55          | (5.85)  | abcd | 55.49     | (5.32)  | abc |
|        |       | PS ac         | 5.70          | (0.80) | a  | 9.82         | (0.53) | a  | 97.63                | (8.57)  | a    | 120.08          | (10.40) | a    | 67.78     | (9.45)  | a   |
| Barley |       | 100 CAN       | 3.05          | (0.36) | bc | 12.50        | (0.28) | b  | 66.66                | (6.51)  | b    | 84.10           | (9.79)  | b    | 0.28      | (0.10)  | b   |
|        |       | 150 CAN       | 3.64          | (0.29) | ab | 13.64        | (0.20) | a  | 87.05                | (7.96)  | a    | 104.80          | (8.86)  | a    | 0.32      | (0.06)  | ab  |
|        |       | CS inc        | 3.51          | (0.12) | ab | 11.95        | (0.31) | b  | 73.57                | (1.64)  | ab   | 89.80           | (2.99)  | ab   | 0.32      | (0.03)  | ab  |
|        |       | CS inc ac     | 3.82          | (0.16) | a  | 11.57        | (0.58) | bc | 77.42                | (1.28)  | ab   | 95.98           | (5.06)  | ab   | 0.38      | (0.05)  | ab  |
|        |       | CS inj        | 3.72          | (0.35) | ab | 12.30        | (0.33) | b  | 80.10                | (7.38)  | ab   | 101.53          | (7.66)  | ab   | 0.43      | (0.07)  | a   |
|        |       | CS th         | 3.43          | (0.16) | ab | 11.65        | (0.35) | bc | 70.22                | (4.27)  | b    | 86.48           | (3.51)  | b    | 0.29      | (0.03)  | ab  |
|        |       | CS th ac      | 3.78          | (0.16) | ab | 12.00        | (0.53) | b  | 79.52                | (4.69)  | ab   | 98.20           | (5.34)  | ab   | 0.40      | (0.05)  | ab  |
|        |       | Control (0 N) | 2.43          | (0.51) | c  | 10.62        | (0.48) | c  | 45.05                | (8.44)  | c    | 56.45           | (8.21)  | c    | -         | -       |     |
